# Supplementary material
Source: publisher site journal article supplement (https://www.spandidos-publications.com/231/downloadSupplementary)

Figure S1. Relative expression of MyD88 and TRIF mRNAs.  $^{***}P<0.01$ , vs. siCon. Con, control; MyD88, myeloid differentiation primary response gene 88; si, small interfering RNA; TRIF, Toll-IL-1 resistance-domain-containing adapter-inducing interferon- $\beta$ .

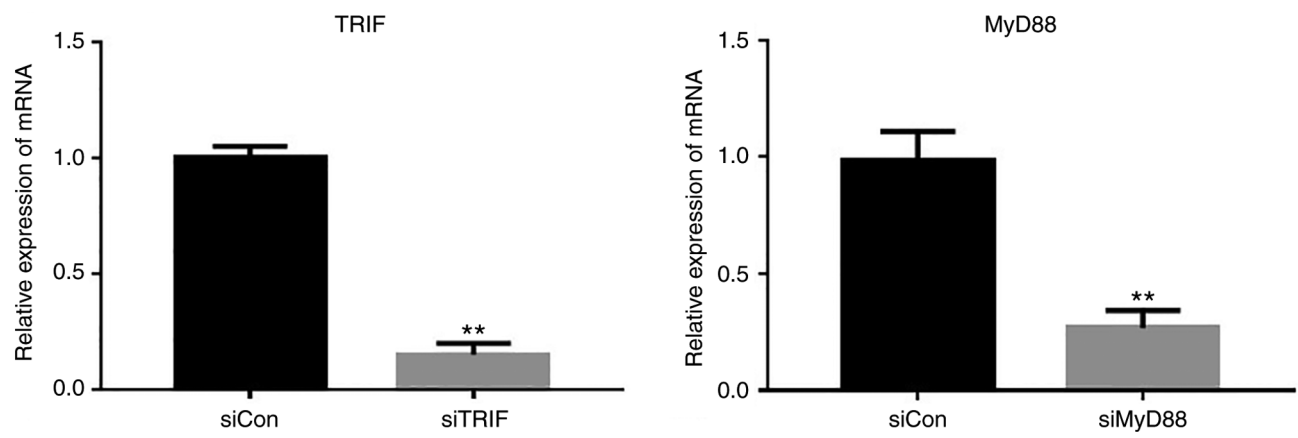

Supplement: Supplementary file 1 [file downloadSupplementary]
